# Supplementary material for: Enhanced Photocatalytic Activity of TiO2/SnO2 Binary Nanocomposites
Source: Hindawi journal article supplement (doi:10.1155/2020/8349480), 2020-08-18
Supplement: f1 [file 8349480.f1.docx]

**Enhanced Photocatalytic activity of TiO2/SnO2 Binary Nanocomposites**

Tetiana A. Dontsova, Anastasiya S. Kutuzova, Kateryna O. Bila, Svitlana O. Kyrii,
Iryna V. Kosogina, and Daria O. Nechyporuk

Department of Inorganic Substances, Water Purification and General Chemical Technology, Chemical Technology Faculty, National Technical University of Ukraine “Igor Sikorsky Kyiv Polytechnic Institute”, 03056, Prosp. Peremohy 37, Kyiv, Ukraine.


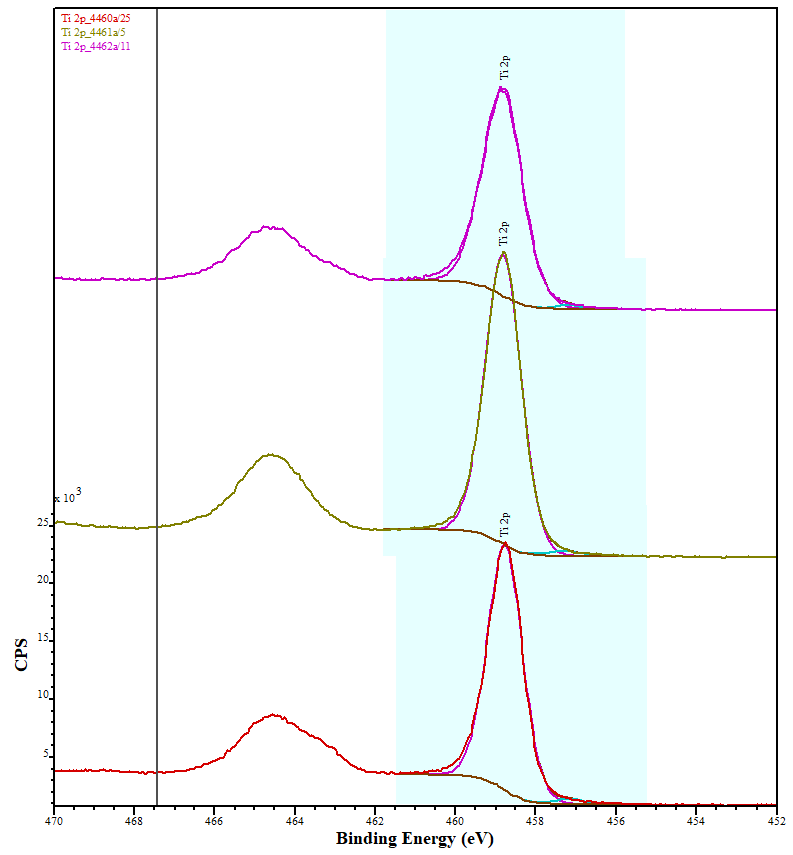


S1: XPS spectra (Ti 2p) of TiO2-SnO2 nanocomposites.


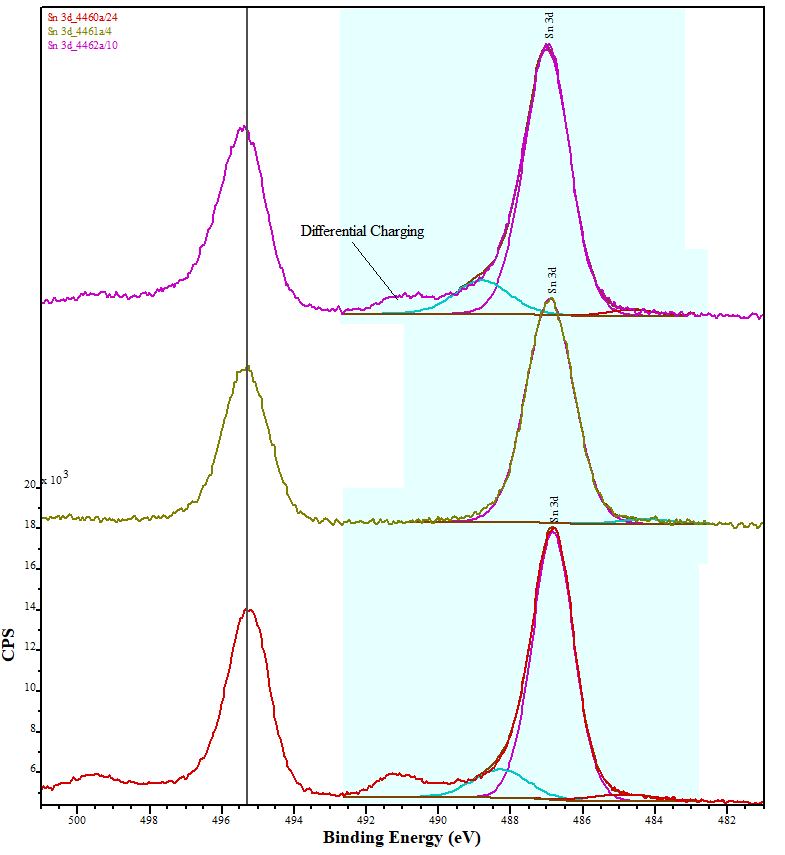


S2: XPS spectra (Sn 3d) of TiO2-SnO2 nanocomposites.


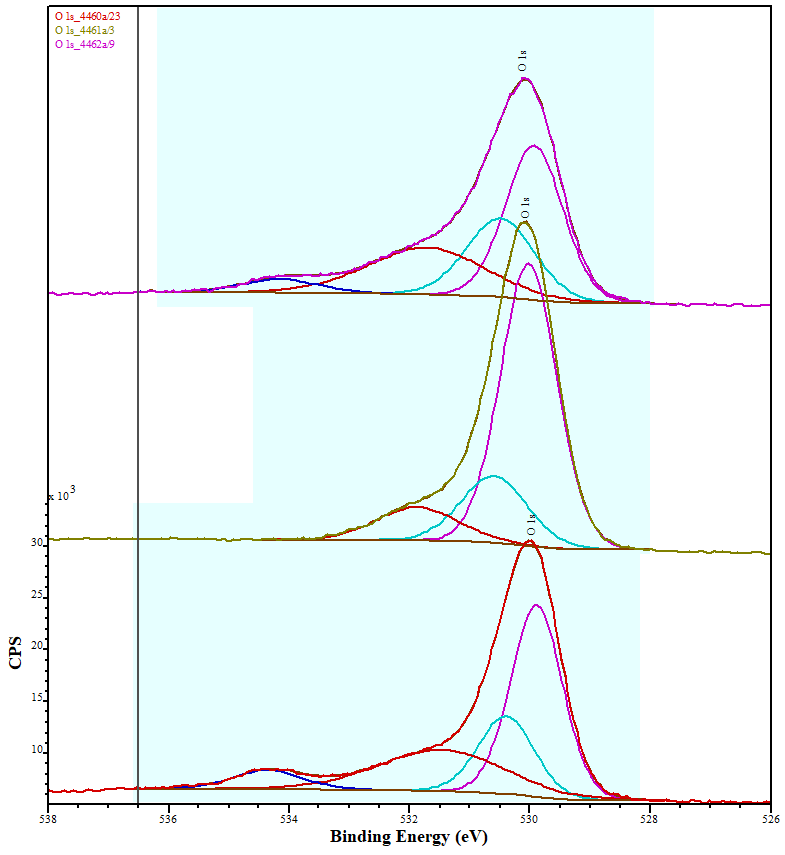


S3: XPS spectra (O 1s) of TiO2-SnO2 nanocomposites.

S4: EPR spectra of (a) TiO2P25, (b) sTiO2, (c) Р25TiO2-SnO2, (d) s1TiO2-SnO2, (e) s2TiO2-SnO2.

S5: Absorption spectra of initial dyes.

|  |  |
| --- | --- |
| **a** | **b** |
|  |  |
| **c** | **d** |
|  | |
| **e** | |

S6: Absorption spectra after photocatalytic removal of Methylene blue.

|  |  |
| --- | --- |
| **a** | **b** |
|  |  |
| **c** | **d** |
|  | |
| **e** | |

S7: Absorption spectra after photocatalytic removal of Congo red.
